# Supplementary material for: Synthesis, structure and reactivity of [TmBut]ZnH, a monomeric terminal zinc hydride compound in a sulfur-rich coordination environment: access to a heterobimetallic compound
Source: Royal Society of Chemistry journal article supplement (doi:10.1039/c5cc08915h), 2016-01-01
Supplement: c5cc08915h1.pdf [file c5cc08915h1.pdf]

## Supporting Information

### **Synthesis, Structure and Reactivity of [Tm<sup>Bu<sup>t</sup></sup>]ZnH, a Monomeric Terminal Zinc Hydride Compound in a Sulfur-Rich Coordination Environment: Access to a Heterobimetallic Compound**

Ava Kreider-Mueller, Patrick J. Quinlivan, Michael Rauch, Jonathan S. Owen\* and

Gerard Parkin,\*

*Department of Chemistry,*

*Columbia University,*

*New York, New York 10027, USA.*

*Received xxxx xx, 2015.*

## EXPERIMENTAL SECTION

### General considerations

All manipulations were performed using a combination of glovebox, high vacuum, and Schlenk techniques under an argon or nitrogen atmosphere.<sup>1</sup> Solvents were purified and degassed using standard procedures. NMR spectra were measured on Bruker 300 DRX, Bruker 300 DPX, Bruker 400 Avance III, Bruker 400 Cyber-enabled Avance III, and Bruker 500 DMX spectrometers. <sup>1</sup>H NMR spectra are reported in ppm relative to SiMe<sub>4</sub> ( $\delta = 0$ ) and were referenced internally with respect to the protio solvent impurity ( $\delta = 7.16$  for C<sub>6</sub>D<sub>5</sub>H).<sup>2</sup> <sup>13</sup>C NMR spectra are reported in ppm relative to SiMe<sub>4</sub> ( $\delta = 0$ ) and were referenced internally with respect to the solvent ( $\delta = 128.06$  for C<sub>6</sub>D<sub>6</sub>).<sup>2</sup> <sup>19</sup>F NMR spectra are reported in ppm relative to CFCl<sub>3</sub> ( $\delta = 0$ ) and were referenced internally with respect to C<sub>6</sub>F<sub>6</sub> ( $\delta = -164.9$ ).<sup>3</sup> Coupling constants are given in hertz. Infrared spectra were recorded on a Perkin Elmer Spectrum Two spectrometer in attenuated total reflectance (ATR) mode, and are reported in reciprocal centimeters. Mass spectra were obtained on a JEOL JMS-HX110HF tandem mass spectrometer using fast atom bombardment (FAB). [Tm<sup>Bu<sup>t</sup></sup>]ZnOPh,<sup>4</sup> CpMo(CO)<sub>3</sub>H<sup>5</sup> and [Tp<sup>Bu<sup>t</sup>,Me</sup>]ZnH<sup>6</sup> were prepared according to the literature procedures. PhOH (Aldrich), PhSH (Aldrich), 4-fluorothiophenol (Aldrich), PhSeH (TCI), Ph<sub>2</sub>S<sub>2</sub> (Aldrich), Ph<sub>2</sub>Se<sub>2</sub> (Aldrich), Ph<sub>2</sub>Te<sub>2</sub> (Aldrich), HCO<sub>2</sub>H (Aldrich), PhSiH<sub>3</sub> (Acros), H<sub>2</sub>S (Aldrich), CO<sub>2</sub> (Aldrich), Me<sub>2</sub>Zn (Strem Chemicals) and Et<sub>2</sub>Zn (Strem Chemicals) were commercially obtained and used without further purification.

### X-ray Structure Determinations

X-ray diffraction data were collected on a Bruker Apex II diffractometer. Crystal data, data collection and refinement parameters are summarized in Table 1. The structures were solved using direct methods and standard difference map techniques, and were refined by full-matrix least-squares procedures on  $F^2$  with SHELXTL (Version 2014/7).<sup>7</sup>

### Synthesis of [Tm<sup>Bu<sup>t</sup></sup>]ZnH

A solution of [Tm<sup>Bu<sup>t</sup></sup>]ZnOPh (162 mg, 0.255 mmol) in C<sub>6</sub>H<sub>6</sub> (*ca.* 6 mL) was treated with PhSiH<sub>3</sub> (35 μL, 0.28 mmol). The solution was stirred at room temperature for 1 hour, over which period a cloudy suspension formed. The volatile components were removed *in vacuo*, and the resulting powder was washed twice with a mixture of pentane (3 mL) and Et<sub>2</sub>O (2 mL), yielding [Tm<sup>Bu<sup>t</sup></sup>]ZnH as a white powder (130 mg, 94%). Crystals suitable for X-ray diffraction were obtained from a solution in benzene.

Analysis calcd. for [Tm<sup>Bu<sup>t</sup></sup>]ZnH•0.5(benzene): C, 49.5%; H, 6.6%; N, 14.4%. Found: C, 50.2%; H, 6.4%; N, 13.9%. <sup>1</sup>H NMR (C<sub>6</sub>D<sub>6</sub>): 1.50 [s, 27H, HB{C<sub>2</sub>N<sub>2</sub>H<sub>2</sub>[C(CH<sub>3</sub>)<sub>3</sub>]CS<sub>3</sub>}], 5.78 [s, 1H, ZnH], 6.39 [d, <sup>3</sup>J<sub>H-H</sub> = 2, 3H, HB{C<sub>2</sub>N<sub>2</sub>H<sub>2</sub>[C(CH<sub>3</sub>)<sub>3</sub>]CS<sub>3</sub>}], 6.70 [d, <sup>3</sup>J<sub>H-H</sub> = 2, 3H, HB{C<sub>2</sub>N<sub>2</sub>H<sub>2</sub>[C(CH<sub>3</sub>)<sub>3</sub>]CS<sub>3</sub>}], [BH, not observed]. <sup>13</sup>C{<sup>1</sup>H} NMR (C<sub>6</sub>D<sub>6</sub>): 28.8 [9C, HB{C<sub>2</sub>N<sub>2</sub>H<sub>2</sub>[C(CH<sub>3</sub>)<sub>3</sub>]CS<sub>3</sub>}], 59.2 [3C, HB{C<sub>2</sub>N<sub>2</sub>H<sub>2</sub>[C(CH<sub>3</sub>)<sub>3</sub>]CS<sub>3</sub>}], 116.4 [3C, HB{C<sub>2</sub>N<sub>2</sub>H<sub>2</sub>[C(CH<sub>3</sub>)<sub>3</sub>]CS<sub>3</sub>}], 122.5 [3C, HB{C<sub>2</sub>N<sub>2</sub>H<sub>2</sub>[C(CH<sub>3</sub>)<sub>3</sub>]CS<sub>3</sub>}], 159.5 [3C, HB{C<sub>2</sub>N<sub>2</sub>H<sub>2</sub>[C(CH<sub>3</sub>)<sub>3</sub>]CS<sub>3</sub>}], 1716 (m), 1564 (w), 1477 (w), 1412 (m), 1396 (m), 1356 (vs), 1302 (m), 1254 (w), 1228 (w), 1190 (s), 1170 (s), 1129 (w), 1062 (m), 1028 (w), 926 (w), 820 (m), 755 (m), 724 (s), 686 (m), 674 (s), 587 (m), 550 (m), 501 (m), 469 (s). FAB-MS: *m/z* = 541.6 [M – H]<sup>+</sup>, M = [Tm<sup>Bu<sup>t</sup></sup>]ZnH.

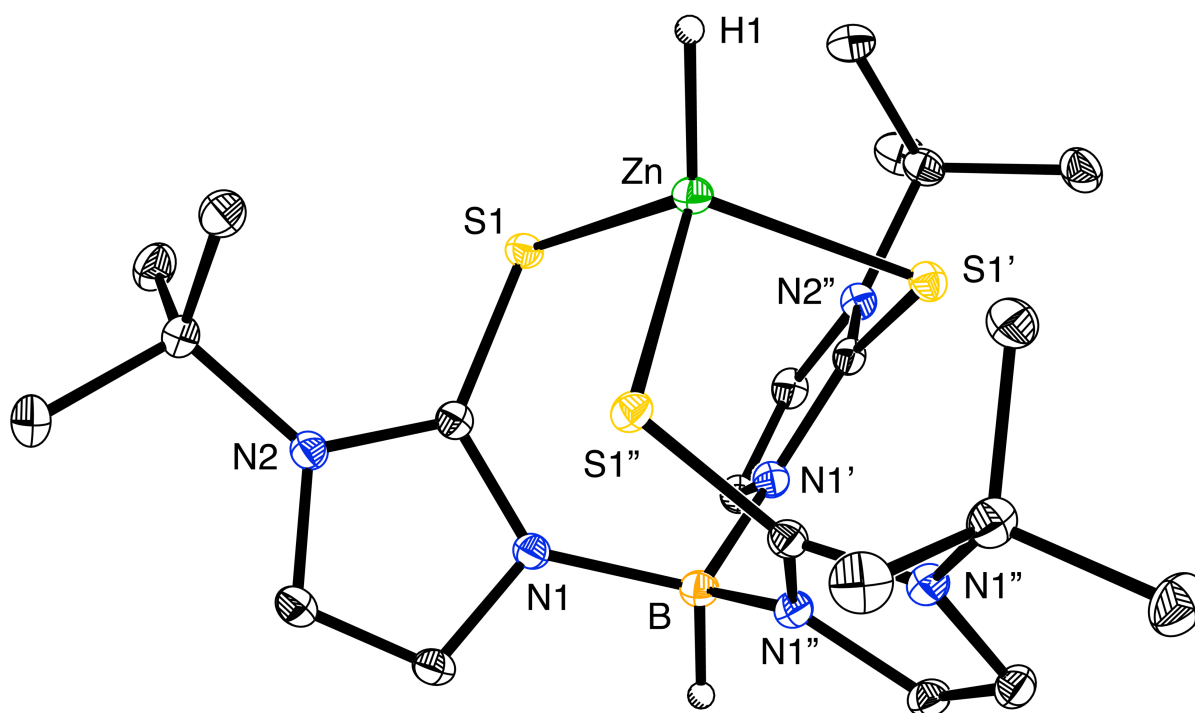

*Molecular Structure of [Tm<sup>Bu<sup>t</sup>}]ZnH</sup>*

### Reaction of [Tm<sup>Bu<sup>t</sup>}]ZnH with H<sub>2</sub>S</sup>

A solution of [Tm<sup>Bu<sup>t</sup>}]ZnH (5 mg, 0.009 mmol) in C<sub>6</sub>D<sub>6</sub> (0.7 mL) in an NMR tube equipped with a J. Young valve was treated with H<sub>2</sub>S (1 atm). The sample was monitored by <sup>1</sup>H NMR spectroscopy, thereby demonstrating the immediate formation of [Tm<sup>Bu<sup>t</sup>}]ZnSH as identified by comparison of the <sup>1</sup>H NMR spectrum to that of an authentic sample.<sup>4</sup></sup></sup>

### Reactivity of [Tm<sup>Bu<sup>t</sup>}]ZnH towards ArEH</sup>

#### (a) PhOH

A solution of [Tm<sup>Bu<sup>t</sup>}]ZnH (8.8 mg, 0.016 mmol) in C<sub>6</sub>D<sub>6</sub> (ca. 0.7 mL) in an NMR tube equipped with a J. Young valve was treated with PhOH (2.3 mg, 0.024 mmol). The sample was monitored by <sup>1</sup>H NMR spectroscopy, thereby demonstrating the rapid</sup>

conversion to  $[\text{Tm}^{\text{Bu}^t}]\text{ZnOPh}$ , as identified by comparison with the data for an authentic sample.<sup>4</sup>

### (b) PhSH

A solution of  $[\text{Tm}^{\text{Bu}^t}]\text{ZnH}$  (10 mg, 0.018 mmol) in  $\text{C}_6\text{D}_6$  (*ca.* 0.7 mL) in an NMR tube equipped with a J. Young valve was prepared in a glove box. The sample was removed from the glove box treated with PhSH (2.3  $\mu\text{L}$ , 0.022 mmol) and then degassed *via* one freeze-pump-thaw cycle. The sample was monitored by  $^1\text{H}$  NMR spectroscopy, thereby demonstrating the rapid conversion to  $[\text{Tm}^{\text{Bu}^t}]\text{ZnSPh}$  as identified by comparison with the data for an authentic sample.<sup>4</sup>

### (c) *p*- $\text{FC}_6\text{H}_4\text{SH}$

A solution of  $[\text{Tm}^{\text{Bu}^t}]\text{ZnH}$  (8 mg, 0.015 mmol) in  $\text{C}_6\text{D}_6$  (*ca.* 0.7 mL) in an NMR tube equipped with a septum was treated with *p*- $\text{FC}_6\text{H}_4\text{SH}$  (1.6  $\mu\text{L}$ , 0.015 mmol). The sample was monitored by  $^1\text{H}$  NMR spectroscopy, thereby demonstrating the rapid conversion to  $[\text{Tm}^{\text{Bu}^t}]\text{ZnS}(\text{C}_6\text{H}_4\text{-4-F})$ . The volatile components were removed by lyophilization to give a white powder, which was dissolved in  $\text{Et}_2\text{O}$  (*ca.* 1 mL). The solution was allowed to evaporate at room temperature to yield  $[\text{Tm}^{\text{Bu}^t}]\text{ZnS}(\text{C}_6\text{H}_4\text{-4-F})$  (7 mg, 71%) as a microcrystalline powder. Analysis calcd. for  $[\text{Tm}^{\text{Bu}^t}]\text{ZnS}(\text{C}_6\text{H}_4\text{-4-F})\cdot(\text{benzene})$ : C, 53.0%; H, 5.9%; N, 11.2%. Found: C, 52.7%; H, 5.8%; N, 11.3%. Crystals of  $[\text{Tm}^{\text{Bu}^t}]\text{ZnS}(\text{C}_6\text{H}_4\text{-4-F})$  suitable for X-ray diffraction were obtained *via* slow diffusion of pentane into a solution in benzene.  $^1\text{H}$  NMR ( $\text{C}_6\text{D}_6$ ): 1.41 [s, 27H,  $\text{HB}\{\text{C}_2\text{N}_2\text{H}_2[\text{C}(\text{CH}_3)_3]\text{CS}\}_3$ ], 6.37 [d,  $^3J_{\text{H-H}} = 2$ , 3H,  $\text{HB}\{\text{C}_2\text{N}_2\text{H}_2[\text{C}(\text{CH}_3)_3]\text{CS}\}_3$ ], 6.62 [d,  $^3J_{\text{H-H}} = 2$ , 3H,  $\text{HB}\{\text{C}_2\text{N}_2\text{H}_2[\text{C}(\text{CH}_3)_3]\text{CS}\}_3$ ], 6.77 [m, 2H,  $\text{CdS}(\text{C}_6\text{H}_4\text{-4-F})$ ], 7.86 [m, 2H,  $\text{CdS}(\text{C}_6\text{H}_4\text{-4-F})$ ], [BH, not observed].  $^{13}\text{C}\{^1\text{H}\}$  NMR ( $\text{C}_6\text{D}_6$ ): 28.7 [9C,  $\text{HB}\{\text{C}_2\text{N}_2\text{H}_2[\text{C}(\text{CH}_3)_3]\text{CS}\}_3$ ], 59.4 [3C,  $\text{HB}\{\text{C}_2\text{N}_2\text{H}_2[\text{C}(\text{CH}_3)_3]\text{CS}\}_3$ ], 114.7 [d,  $^2J_{\text{C-F}} = 21$ , 2C,  $\text{CdS}(\text{C}_6\text{H}_4\text{-4-F})$ ], 117.0 [3C,  $\text{HB}\{\text{C}_2\text{N}_2\text{H}_2[\text{C}(\text{CH}_3)_3]\text{CS}\}_3$ ], 122.9 [3C,  $\text{HB}\{\text{C}_2\text{N}_2\text{H}_2[\text{C}(\text{CH}_3)_3]\text{CS}\}_3$ ], 135.7 [d,  $^3J_{\text{C-F}} = 7$ , 2C,  $\text{CdS}(\text{C}_6\text{H}_4\text{-4-F})$ ], 139.9 [d,  $^4J_{\text{C-F}} = 3$ , 1C,  $\text{CdS}(\text{C}_6\text{H}_4\text{-4-F})$ ], 157.2 [3C,

HB{C<sub>2</sub>N<sub>2</sub>H<sub>2</sub>[C(CH<sub>3</sub>)<sub>3</sub>]CS<sub>3</sub>}, 160.6 [d, <sup>1</sup>J<sub>C-F</sub> = 240, 1C, CdS(C<sub>6</sub>H<sub>4</sub>-4-F)]. <sup>19</sup>F NMR (C<sub>6</sub>D<sub>6</sub>): 125.31 (multiplet). IR data (ATR, cm<sup>-1</sup>): 3180 (w), 3147 (w), 2976 (w), 2928 (w), 2417 (w), 2233 (w), 1860 (w), 1687 (w), 1565 (m), 1480 (s), 1420 (m), 1398 (w), 1362 (vs), 1310 (m), 1259 (w), 1221 (m), 1194 (vs), 1174 (vs), 1130 (m), 1087 (m), 1071 (m), 1031 (w), 1014 (w), 928 (w), 816 (s), 759 (s), 732 (vs), 688 (s), 626 (s), 590 (m), 554 (m), 494 (s), 458 (w).

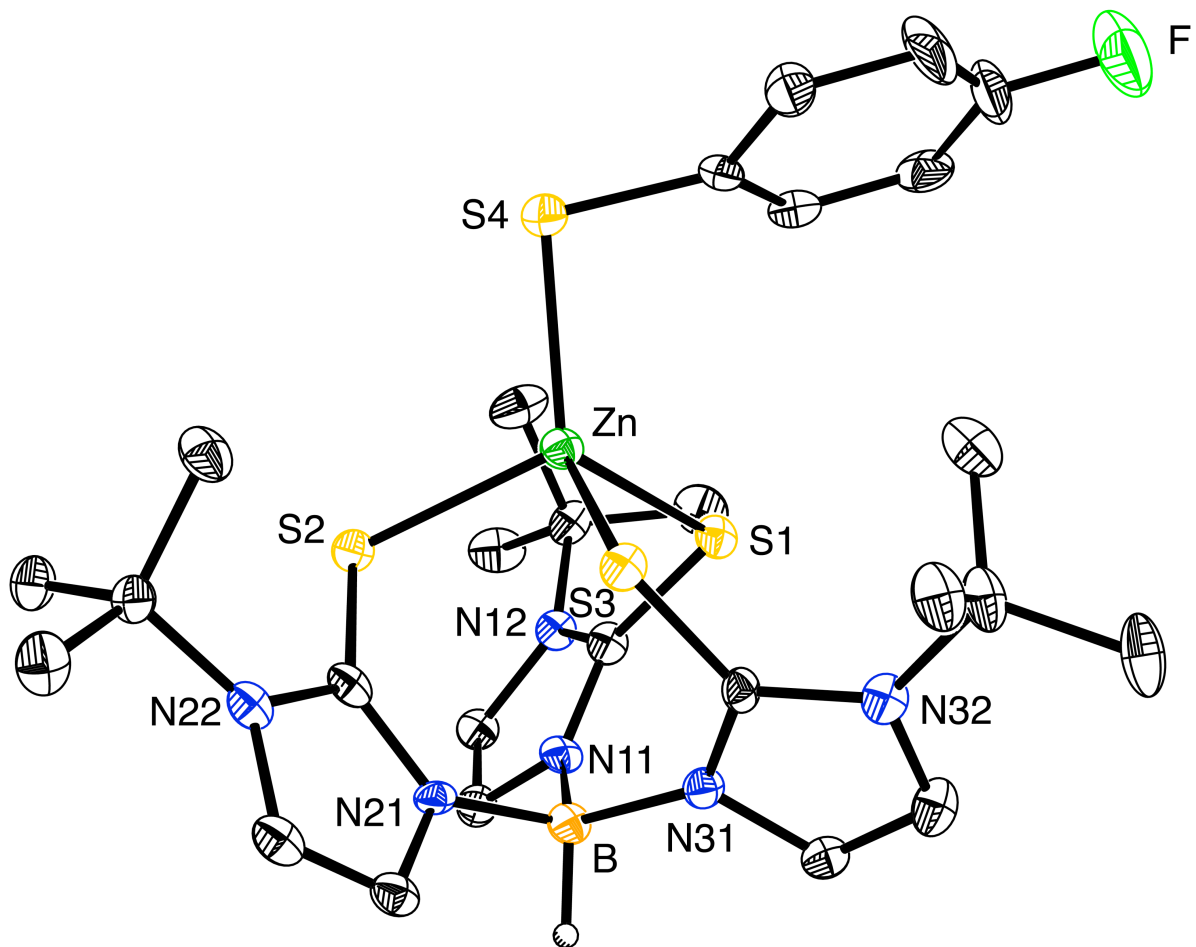

*Molecular Structure of [Tm<sup>Bu<sup>t</sup></sup>]ZnS(C<sub>6</sub>H<sub>4</sub>-4-F)*

#### (d) PhSeH

A solution of [Tm<sup>Bu<sup>t</sup></sup>]ZnH (10 mg, 0.018 mmol) in C<sub>6</sub>D<sub>6</sub> (ca. 0.7 mL) in an NMR tube equipped with a septum was treated with PhSeH (2 μL, 0.019 mmol). The sample was

monitored by  $^1\text{H}$  NMR spectroscopy, thereby demonstrating the rapid conversion to  $[\text{Tm}^{\text{Bu}^t}]\text{ZnSePh}$ , as identified by comparison with the data for an authentic sample.<sup>4</sup>

### Reactivity of $[\text{Tm}^{\text{Bu}^t}]\text{ZnH}$ towards $\text{Ph}_2\text{E}_2$

#### (a) $\text{Ph}_2\text{S}_2$

A solution of  $[\text{Tm}^{\text{Bu}^t}]\text{ZnH}$  (10 mg, 0.018 mmol) in  $\text{C}_6\text{D}_6$  (*ca.* 0.7 mL) in an NMR tube equipped with a J. Young valve was treated with  $\text{Ph}_2\text{S}_2$  (2 mg, 0.009 mmol). The sample was monitored by  $^1\text{H}$  NMR spectroscopy, thereby demonstrating the rapid conversion to  $[\text{Tm}^{\text{Bu}^t}]\text{ZnSPh}$ , as identified by comparison with the data for an authentic sample.<sup>4</sup> The conversion is quantitative in the presence of excess  $\text{Ph}_2\text{S}_2$ .

#### (b) $\text{Ph}_2\text{Se}_2$

A solution of  $[\text{Tm}^{\text{Bu}^t}]\text{ZnH}$  (6 mg, 0.011 mmol) in  $\text{C}_6\text{D}_6$  (*ca.* 0.7 mL) in an NMR tube equipped with a J. Young valve was treated with  $\text{Ph}_2\text{Se}_2$  (2 mg, 0.006 mmol). The sample was monitored by  $^1\text{H}$  NMR spectroscopy, thereby demonstrating the rapid conversion to  $[\text{Tm}^{\text{Bu}^t}]\text{ZnSePh}$ , as identified by comparison with the data for an authentic sample.<sup>4</sup> The conversion is quantitative in the presence of excess  $\text{Ph}_2\text{Se}_2$ .

#### (c) $\text{Ph}_2\text{Te}_2$

A solution of  $[\text{Tm}^{\text{Bu}^t}]\text{ZnH}$  (6 mg, 0.011 mmol) in  $\text{C}_6\text{D}_6$  (*ca.* 0.7 mL) in an NMR tube equipped with a J. Young valve was treated with  $\text{Ph}_2\text{Te}_2$  (2 mg, 0.005 mmol). The sample was monitored by  $^1\text{H}$  NMR spectroscopy, thereby demonstrating the rapid conversion to  $[\text{Tm}^{\text{Bu}^t}]\text{ZnTePh}$ , as identified by comparison with the data for an authentic sample.<sup>4</sup> The conversion is quantitative in the presence of excess  $\text{Ph}_2\text{Te}_2$ .

## Synthesis of [Tm<sup>Bu<sup>t</sup></sup>]Zn( $\kappa^1$ -O<sub>2</sub>CH)

### (a) From HCO<sub>2</sub>H

A solution of [Tm<sup>Bu<sup>t</sup></sup>]ZnH (25 mg, 0.046 mmol) in benzene (*ca.* 0.7 mL) was treated with formic acid (1.8  $\mu$ L, 0.048 mmol), resulting in immediate effervescence. The volatile components were removed by lyophilization to yield [Tm<sup>Bu<sup>t</sup></sup>]Zn( $\kappa^1$ -O<sub>2</sub>CH) as a white powder (24 mg, 89%). Crystals of [Tm<sup>Bu<sup>t</sup></sup>]Zn( $\kappa^1$ -O<sub>2</sub>CH) suitable for X-ray diffraction were obtained *via* slow diffusion of pentane into a solution in benzene. Analysis calcd. for [Tm<sup>Bu<sup>t</sup></sup>]Zn( $\kappa^1$ -O<sub>2</sub>CH)•(benzene): C, 50.5%; H, 6.2%; N, 12.6%. Found: C, 49.7%; H, 6.9%; N, 12.0%. <sup>1</sup>H NMR (C<sub>6</sub>D<sub>6</sub>): 1.48 [s, 27H, HB{C<sub>2</sub>N<sub>2</sub>H<sub>2</sub>[C(CH<sub>3</sub>)<sub>3</sub>]CS<sub>3</sub>}], 6.37 [d, <sup>3</sup>J<sub>H-H</sub> = 2, 3H, HB{C<sub>2</sub>N<sub>2</sub>H<sub>2</sub>[C(CH<sub>3</sub>)<sub>3</sub>]CS<sub>3</sub>}], 6.64 [d, <sup>3</sup>J<sub>H-H</sub> = 2, 3H, HB{C<sub>2</sub>N<sub>2</sub>H<sub>2</sub>[C(CH<sub>3</sub>)<sub>3</sub>]CS<sub>3</sub>}], 9.15 [s, 1 H, O<sub>2</sub>CH], [BH, not observed]. <sup>13</sup>C{<sup>1</sup>H} NMR (C<sub>6</sub>D<sub>6</sub>): 28.9 [9C, HB{C<sub>2</sub>N<sub>2</sub>H<sub>2</sub>[C(CH<sub>3</sub>)<sub>3</sub>]CS<sub>3</sub>}], 59.6 [3C, HB{C<sub>2</sub>N<sub>2</sub>H<sub>2</sub>[C(CH<sub>3</sub>)<sub>3</sub>]CS<sub>3</sub>}], 117.1 [3C, HB{C<sub>2</sub>N<sub>2</sub>H<sub>2</sub>[C(CH<sub>3</sub>)<sub>3</sub>]CS<sub>3</sub>}], 123.0 [3C, HB{C<sub>2</sub>N<sub>2</sub>H<sub>2</sub>[C(CH<sub>3</sub>)<sub>3</sub>]CS<sub>3</sub>}], 157.5 [3C, HB{C<sub>2</sub>N<sub>2</sub>H<sub>2</sub>[C(CH<sub>3</sub>)<sub>3</sub>]CS<sub>3</sub>}], 167.4 [1C of O<sub>2</sub>CH]. IR data (ATR, cm<sup>-1</sup>): 3144 (w), 2977 (w), 2926(w), 2801 (w), 2420 (w), 1630 (s), 1567 (w), 1480 (w), 1419 (m), 1398 (m), 1362 (vs), 1305 (m), 1229 (w), 1193 (vs), 1174 (vs), 1133 (w), 1071 (w), 1031 (w), 929 (w), 821 (m), 760 (m), 728 (s), 685 (s), 590 (m), 553 (m), 495 (m), 456 (w). FAB-MS: *m/z* = 541.5 [M - O<sub>2</sub>CH]<sup>+</sup>, M = [Tm<sup>Bu<sup>t</sup></sup>]ZnO<sub>2</sub>CH.

### (b) From CO<sub>2</sub>

A solution of [Tm<sup>Bu<sup>t</sup></sup>]ZnH (11 mg, 0.020 mmol) in C<sub>6</sub>D<sub>6</sub> (*ca.* 0.7 mL) in an NMR tube equipped with a J. Young valve was treated with CO<sub>2</sub> (*ca.* 1.3 atm). The reaction was monitored by <sup>1</sup>H NMR spectroscopy, thereby demonstrating the rapid formation of [Tm<sup>Bu<sup>t</sup></sup>]Zn( $\kappa^1$ -O<sub>2</sub>CH).



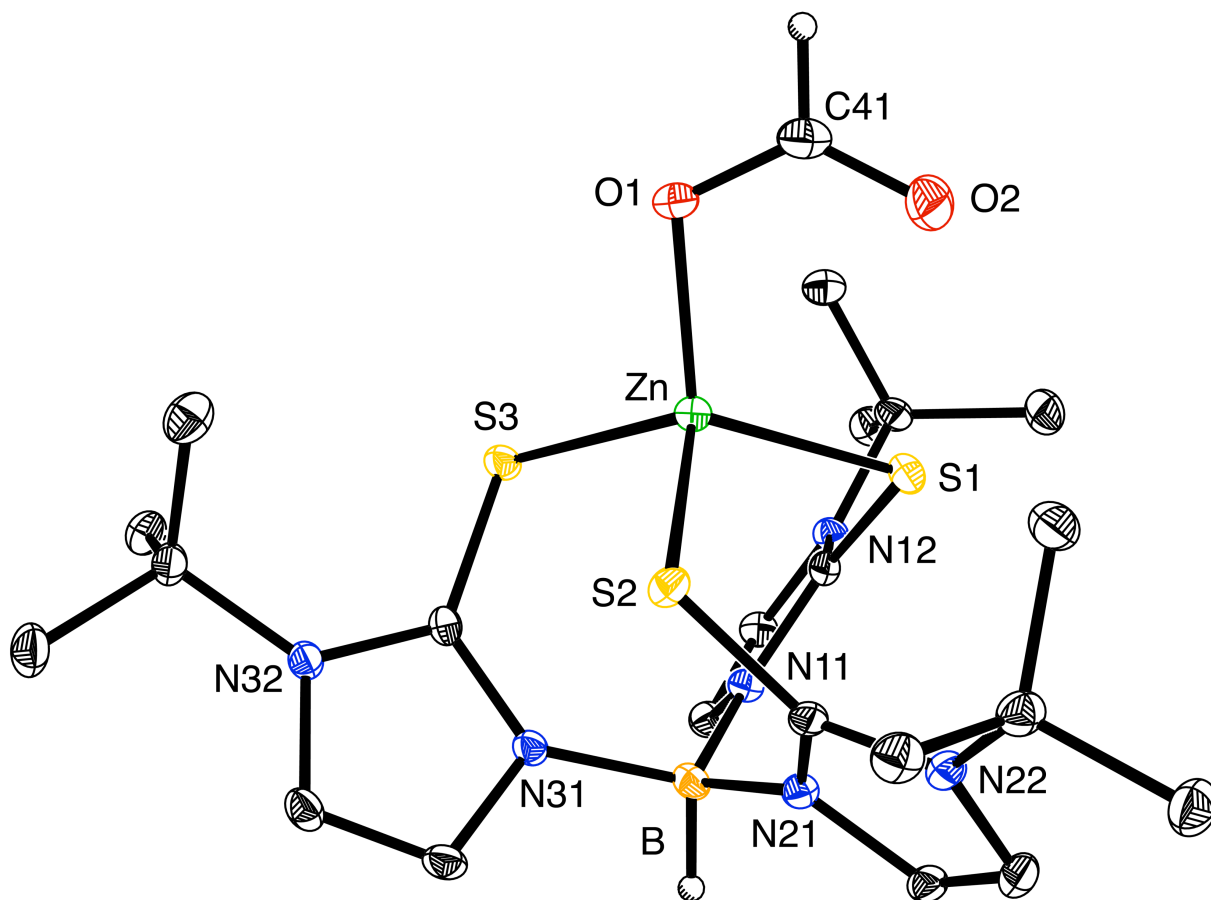

Molecular Structure of  $[\text{Tm}^{\text{Bu}^t}]^-\text{Zn}(\kappa^1\text{-O}_2\text{CH})$

### Synthesis of $[\text{Tm}^{\text{Bu}^t}]\text{ZnEt}$

A solution of  $[\text{Tm}^{\text{Bu}^t}]\text{ZnH}$  (10 mg, 0.018 mmol) in  $\text{C}_6\text{D}_6$  (ca. 0.7 mL) in an NMR tube equipped with a J. Young valve was treated with  $\text{Et}_2\text{Zn}$  (25  $\mu\text{L}$  of a 0.9 M solution in  $\text{C}_6\text{D}_6$ , 0.023 mmol), thereby resulting in the formation of  $[\text{Tm}^{\text{Bu}^t}]\text{ZnEt}$  accompanied by a dark gray precipitate. The mixture was filtered after one hour and the volatile components were removed by lyophilization, yielding  $[\text{Tm}^{\text{Bu}^t}]\text{ZnEt}$  as a white powder (6 mg, 57%). Crystals of  $[\text{Tm}^{\text{Bu}^t}]\text{ZnEt}$  suitable for X-ray diffraction were obtained *via* slow diffusion of pentane into a solution in benzene. Analysis calcd. for  $[\text{Tm}^{\text{Bu}^t}]\text{ZnEt}$ : C, 48.3%; H, 6.9%; N, 14.7%. Found: C, 48.0%; H, 7.1%; N, 14.3%.  $^1\text{H}$  NMR ( $\text{C}_6\text{D}_6$ , room temperature): 1.069 [A component of  $\text{ABX}_3$  multiplet,  $^2J_{\text{H-H}} = 13$ ,  $^3J_{\text{H-H}} = 8$ , 1H of  $\text{ZnCH}_2\text{CH}_3$ ], 1.085 [B component of  $\text{ABX}_3$  multiplet,  $^2J_{\text{H-H}} = 13$ ,  $^3J_{\text{H-H}} = 8$ , 1H of

ZnCH<sub>2</sub>CH<sub>3</sub>], 1.53 [s, 27H, HB{C<sub>2</sub>N<sub>2</sub>H<sub>2</sub>[C(CH<sub>3</sub>)<sub>3</sub>]CS<sub>3</sub>}], 1.99 [X<sub>3</sub> component of ABX<sub>3</sub> multiplet, t, <sup>3</sup>J<sub>H-H</sub> = 8, 3H, ZnCH<sub>2</sub>CH<sub>3</sub>], 4.72 [broad s, 1H, HB{C<sub>2</sub>N<sub>2</sub>H<sub>2</sub>[C(CH<sub>3</sub>)<sub>3</sub>]CS<sub>3</sub>}], 6.41 [d, <sup>3</sup>J<sub>H-H</sub> = 2, 3H, HB{C<sub>2</sub>N<sub>2</sub>H<sub>2</sub>[C(CH<sub>3</sub>)<sub>3</sub>]CS<sub>3</sub>}], 6.70 [d, <sup>3</sup>J<sub>H-H</sub> = 2, 3H, HB{C<sub>2</sub>N<sub>2</sub>H<sub>2</sub>[C(CH<sub>3</sub>)<sub>3</sub>]CS<sub>3</sub>]. <sup>1</sup>H NMR (C<sub>7</sub>D<sub>8</sub>, 340 K) 0.78 [q, <sup>3</sup>J<sub>H-H</sub> = 8, 2H of ZnCH<sub>2</sub>CH<sub>3</sub>], 1.55 [s, 27H, HB{C<sub>2</sub>N<sub>2</sub>H<sub>2</sub>[C(CH<sub>3</sub>)<sub>3</sub>]CS<sub>3</sub>}], 1.73 [t, <sup>3</sup>J<sub>H-H</sub> = 8, 3H, ZnCH<sub>2</sub>CH<sub>3</sub>], 4.52 [broad m, 1H, HB{C<sub>2</sub>N<sub>2</sub>H<sub>2</sub>[C(CH<sub>3</sub>)<sub>3</sub>]CS<sub>3</sub>}], 6.46 [d, <sup>3</sup>J<sub>H-H</sub> = 2, 3H, HB{C<sub>2</sub>N<sub>2</sub>H<sub>2</sub>[C(CH<sub>3</sub>)<sub>3</sub>]CS<sub>3</sub>}], 6.60 [d, <sup>3</sup>J<sub>H-H</sub> = 2, 3H, HB{C<sub>2</sub>N<sub>2</sub>H<sub>2</sub>[C(CH<sub>3</sub>)<sub>3</sub>]CS<sub>3</sub>]. <sup>13</sup>C{<sup>1</sup>H} NMR (C<sub>6</sub>D<sub>6</sub>): 5.4 [1C of ZnCH<sub>2</sub>CH<sub>3</sub>], 14.9 [1C of ZnCH<sub>2</sub>CH<sub>3</sub>], 28.8 [9C, HB{C<sub>2</sub>N<sub>2</sub>H<sub>2</sub>[C(CH<sub>3</sub>)<sub>3</sub>]CS<sub>3</sub>}], 59.0 [3C, HB{C<sub>2</sub>N<sub>2</sub>H<sub>2</sub>[C(CH<sub>3</sub>)<sub>3</sub>]CS<sub>3</sub>}], 116.3 [3C, HB{C<sub>2</sub>N<sub>2</sub>H<sub>2</sub>[C(CH<sub>3</sub>)<sub>3</sub>]CS<sub>3</sub>}], 122.5 [3C, HB{C<sub>2</sub>N<sub>2</sub>H<sub>2</sub>[C(CH<sub>3</sub>)<sub>3</sub>]CS<sub>3</sub>}], 159.6 [3C, HB{C<sub>2</sub>N<sub>2</sub>H<sub>2</sub>[C(CH<sub>3</sub>)<sub>3</sub>]CS<sub>3</sub>}. IR Data (ATR, cm<sup>-1</sup>): 3134 (w), 2976 (w), 2925 (w), 2878 (w), 2415 (w), 2294 (w), 2237 (w), 1566 (w), 1481 (w), 1417 (m), 1396 (w), 1360 (vs), 1299 (m), 1255 (w), 1228 (w), 1193 (vs), 1174 (vs), 1133 (w), 1069 (m), 1029 (w), 980 (w), 929 (w), 908 (w), 821 (m), 757 (m), 725 (s), 686 (s), 634 (w), 588 (m), 554 (m), 495 (m), 457 (w).

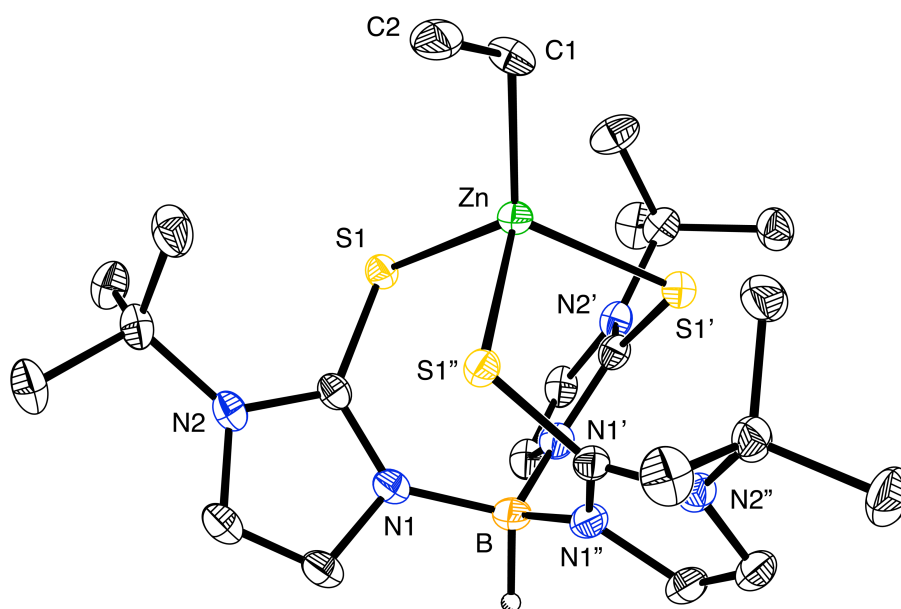

*Molecular Structure of [Tm<sup>But</sup>]ZnEt*

*(only one configuration of the disordered ethyl group is shown)*

### Reactivity of [Tm<sup>But</sup>]ZnH towards Me<sub>2</sub>Zn

A solution of [Tm<sup>But</sup>]ZnH (5 mg, 0.009 mmol) in C<sub>6</sub>D<sub>6</sub> (0.7 mL) in an NMR tube equipped with a J. Young valve was treated with Me<sub>2</sub>Zn (7 mg, 0.073 mmol), resulting in the deposition of a white precipitate. The mixture was lyophilized to afford [Tm<sup>But</sup>]ZnMe as a white powder as identified by comparison of the <sup>1</sup>H NMR spectrum to that of an authentic sample.<sup>4</sup>

### Reactivity of [Tm<sup>But</sup>]ZnH towards Me<sub>2</sub>Cd

A solution of [Tm<sup>But</sup>]ZnH (5 mg, 0.09 mmol) in C<sub>6</sub>D<sub>6</sub> (ca. 0.7 mL) in an NMR tube equipped with a J. Young valve was treated with Me<sub>2</sub>Cd (100 μL of a 0.111 M solution in C<sub>6</sub>D<sub>6</sub>, 0.011 mmol) resulting in the formation of a dark precipitate. The sample was monitored by <sup>1</sup>H NMR spectroscopy, thereby demonstrating the formation of, inter alia, [Tm<sup>But</sup>]CdMe.<sup>8</sup>

### Synthesis of [Tm<sup>But</sup>]ZnMoCp(CO)<sub>3</sub>

A solution of [Tm<sup>But</sup>]ZnH (12 mg, 0.022 mmol) in C<sub>6</sub>D<sub>6</sub> (ca. 0.7 mL) in an NMR tube equipped with a J. Young valve was treated with CpMo(CO)<sub>3</sub>H (12 mg, 0.049 mmol), resulting in immediate evolution of H<sub>2</sub>. The mixture was filtered and the volatile components were removed from the filtrate by lyophilization to yield [Tm<sup>But</sup>]ZnMoCp(CO)<sub>3</sub> as a pale pink powder (10 mg, 58%). Crystals of [Tm<sup>But</sup>]ZnMoCp(CO)<sub>3</sub> suitable for X-ray diffraction were obtained *via* slow diffusion of pentane into a solution in benzene. Analysis calcd. for [Tm<sup>But</sup>]ZnMoCp(CO)<sub>3</sub>•(benzene): C, 48.5%; H, 5.2%; N, 9.7%. Found: C, 48.2%; H, 5.0%; N, 9.4%. <sup>1</sup>H NMR (CD<sub>2</sub>Cl<sub>2</sub>): 1.78 [s, 27H, HB{C<sub>2</sub>N<sub>2</sub>H<sub>2</sub>[C(CH<sub>3</sub>)<sub>3</sub>]CS<sub>3</sub>}], 5.19 [s, 5H, MoCp], 6.84 [d, <sup>3</sup>J<sub>H-H</sub> = 2, 3H, HB{C<sub>2</sub>N<sub>2</sub>H<sub>2</sub>[C(CH<sub>3</sub>)<sub>3</sub>]CS<sub>3</sub>}], 7.05 [d, <sup>3</sup>J<sub>H-H</sub> = 2, 3H, HB{C<sub>2</sub>N<sub>2</sub>H<sub>2</sub>[C(CH<sub>3</sub>)<sub>3</sub>]CS<sub>3</sub>}]. <sup>13</sup>C{<sup>1</sup>H} NMR (CD<sub>2</sub>Cl<sub>2</sub>): 29.3 [9C, HB{C<sub>2</sub>N<sub>2</sub>H<sub>2</sub>[C(CH<sub>3</sub>)<sub>3</sub>]CS<sub>3</sub>}], 59.8 [3C, HB{C<sub>2</sub>N<sub>2</sub>H<sub>2</sub>[C(CH<sub>3</sub>)<sub>3</sub>]CS<sub>3</sub>}], 88.8 [5C of MoCp], 117.1 [3C,

HB{C<sub>2</sub>N<sub>2</sub>H<sub>2</sub>[C(CH<sub>3</sub>)<sub>3</sub>]CS<sub>3</sub>}, 123.5 [3C, HB{C<sub>2</sub>N<sub>2</sub>H<sub>2</sub>[C(CH<sub>3</sub>)<sub>3</sub>]CS<sub>3</sub>}, 157.0 [3C, HB{C<sub>2</sub>N<sub>2</sub>H<sub>2</sub>[C(CH<sub>3</sub>)<sub>3</sub>]CS<sub>3</sub>}, 3C of CO not observed. IR Data for [Tm<sup>Bu<sup>t</sup></sup>]ZnMoCp(CO)<sub>3</sub> (ATR, cm<sup>-1</sup>): 3186 (w), 3153 (w), 2978 (w), 2925 (w), 2419 (w), 1938 (s), 1835 (vs), 1568 (m), 1478 (m), 1420 (m), 1397 (m), 1360 (vs), 1307 (m), 1258 (w), 1229 (w), 1195 (s), 1174 (s), 1136 (w), 1105 (w), 1072 (w), 1059 (w), 1036 (w), 1010 (w), 1001 (w), 926 (w), 853 (w), 837 (w), 822 (m), 801 (m), 760 (m), 737 (m), 724 (m), 680 (vs), 598 (s), 555 (m), 515 (m), 490 (m), 457 (w). FAB-MS: m/z = 541.2 [M - MoCp(CO)<sub>3</sub>]<sup>+</sup>, M = [Tm<sup>Bu<sup>t</sup></sup>]ZnMoCp(CO)<sub>3</sub>.

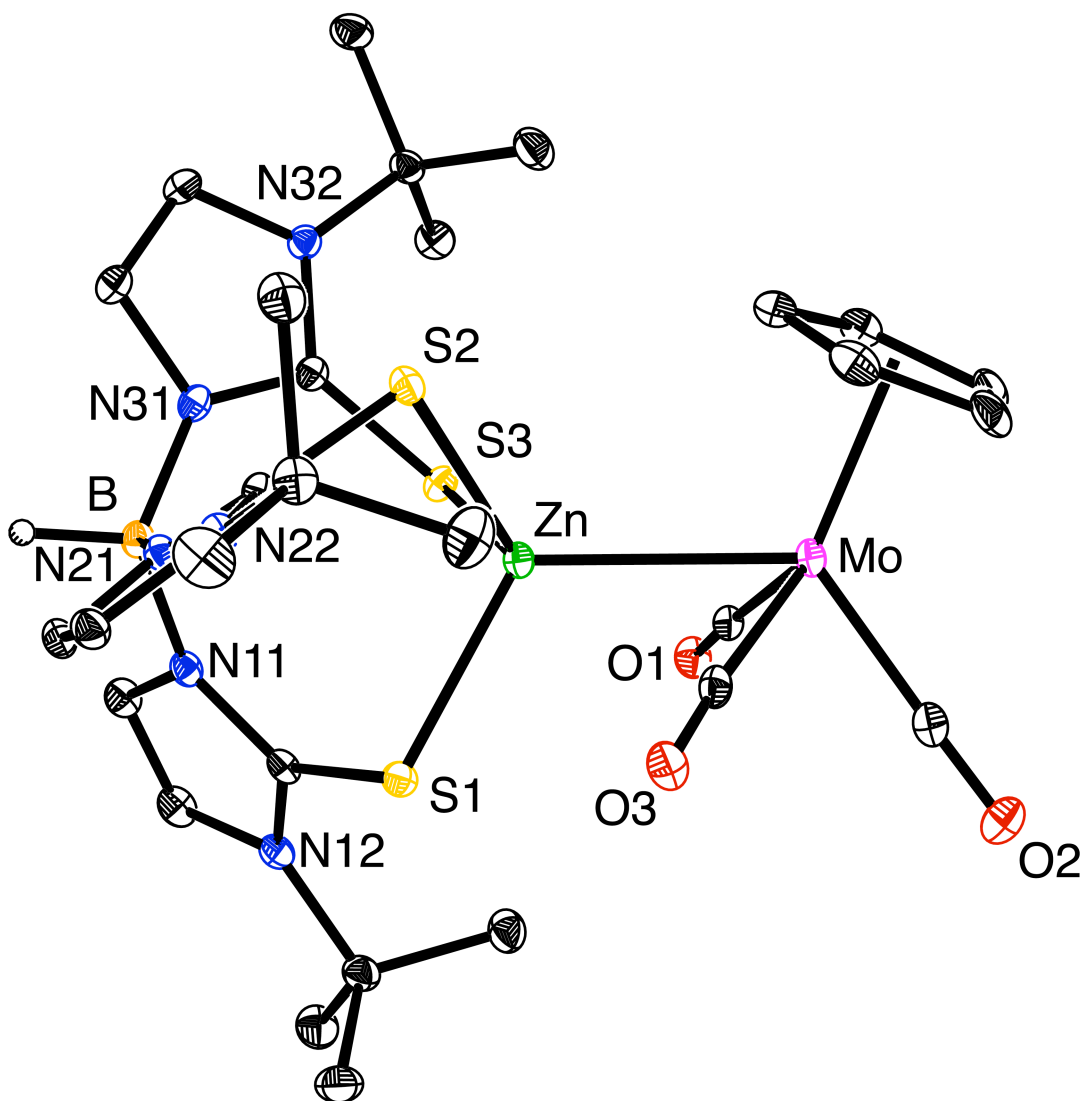

*Molecular Structure of [Tm<sup>Bu<sup>t</sup></sup>]ZnMoCp(CO)<sub>3</sub>*

**Comparison of the Reactivity of [Tm<sup>Bu<sup>t</sup></sup>]ZnH and [Tp<sup>Bu<sup>t</sup>,Me</sup>]ZnH towards CO<sub>2</sub>**

A solution of [Tm<sup>Bu<sup>t</sup></sup>]ZnH (5.0 mg, 0.009 mmol) and [Tp<sup>Bu<sup>t</sup>,Me</sup>]ZnH (4.5 mg, 0.009 mmol) in C<sub>6</sub>D<sub>6</sub> (0.7 mL) in an NMR tube equipped with a J. Young valve was treated with CO<sub>2</sub> (1 atm). The reaction was monitored by <sup>1</sup>H NMR spectroscopy, thereby demonstrating the immediate formation of [Tm<sup>Bu<sup>t</sup></sup>]Zn(κ<sup>1</sup>-O<sub>2</sub>CH), while [Tp<sup>Bu<sup>t</sup>,Me</sup>]ZnH remained unreacted. The mixture was allowed to stand overnight at room temperature, after which period *ca.* 35 % of [Tp<sup>Bu<sup>t</sup>,Me</sup>]ZnH had converted to [Tp<sup>Bu<sup>t</sup>,Me</sup>]Zn(κ<sup>1</sup>-O<sub>2</sub>CH). The mixture was then heated at 60 °C for one day, thereby resulting in complete conversion of [Tp<sup>Bu<sup>t</sup>,Me</sup>]ZnH to [Tp<sup>Bu<sup>t</sup>,Me</sup>]Zn(κ<sup>1</sup>-O<sub>2</sub>CH).

**Table 1.** Crystal, intensity collection and refinement data.

|                                          | [Tm <sup>Bu<sup>t</sup></sup> ]ZnH•0.5(C <sub>6</sub> H <sub>6</sub> ) | [Tm <sup>Bu<sup>t</sup></sup> ]ZnS(C <sub>6</sub> H <sub>4</sub> -4-F) |
|------------------------------------------|------------------------------------------------------------------------|------------------------------------------------------------------------|
| lattice                                  | Rhombohedral                                                           | Monoclinic                                                             |
| formula                                  | C <sub>24</sub> H <sub>38</sub> BN <sub>6</sub> S <sub>3</sub> Zn      | C <sub>27</sub> H <sub>38</sub> BFN <sub>6</sub> S <sub>4</sub> Zn     |
| formula weight                           | 1165.93                                                                | 670.05                                                                 |
| space group                              | <i>R</i> -3                                                            | <i>P</i> 2 <sub>1</sub> / <i>n</i>                                     |
| <i>a</i> /Å                              | 13.3984(11)                                                            | 13.199(5)                                                              |
| <i>b</i> /Å                              | 13.3984(11)                                                            | 17.979(6)                                                              |
| <i>c</i> /Å                              | 27.542(2)                                                              | 13.504(5)                                                              |
| $\alpha$ /°                              | 90                                                                     | 90                                                                     |
| $\beta$ /°                               | 90                                                                     | 92.785(5)                                                              |
| $\gamma$ /°                              | 120                                                                    | 90                                                                     |
| <i>V</i> /Å <sup>3</sup>                 | 4281.9(6)                                                              | 3200.9(19)                                                             |
| <i>Z</i>                                 | 6                                                                      | 4                                                                      |
| temperature (K)                          | 130(2)                                                                 | 130(2)                                                                 |
| radiation ( $\lambda$ , Å)               | 0.71073                                                                | 0.71073                                                                |
| $\rho$ (calcd.), g cm <sup>-3</sup>      | 1.356                                                                  | 1.390                                                                  |
| $\mu$ (Mo K $\alpha$ ), mm <sup>-1</sup> | 1.104                                                                  | 1.062                                                                  |
| $\theta$ max, deg.                       | 32.771                                                                 | 25.679                                                                 |
| no. of data collected                    | 22244                                                                  | 35664                                                                  |
| no. of data used                         | 3358                                                                   | 6078                                                                   |
| no. of parameters                        | 113                                                                    | 373                                                                    |
| $R_1$ [ $I > 2\sigma(I)$ ]               | 0.0373                                                                 | 0.0680                                                                 |
| $wR_2$ [ $I > 2\sigma(I)$ ]              | 0.0739                                                                 | 0.1182                                                                 |
| $R_1$ [all data]                         | 0.0651                                                                 | 0.1651                                                                 |
| $wR_2$ [all data]                        | 0.0799                                                                 | 0.1524                                                                 |
| GOF                                      | 1.005                                                                  | 1.006                                                                  |
| $R_{\text{int}}$                         | 0.0755                                                                 | 0.2396                                                                 |

Table 1 (continued). Crystal, intensity collection and refinement data.

|                                                     | [Tm <sup>Bu<sup>t</sup></sup> ]Zn-<br>(κ <sup>1</sup> -O <sub>2</sub> CH)•2(C <sub>6</sub> H <sub>6</sub> ) | [Tm <sup>Bu<sup>t</sup></sup> ]ZnEt•3(C <sub>6</sub> H <sub>6</sub> ) |
|-----------------------------------------------------|-------------------------------------------------------------------------------------------------------------|-----------------------------------------------------------------------|
| lattice                                             | Monoclinic                                                                                                  | Rhombohedral                                                          |
| formula                                             | C <sub>34</sub> H <sub>47</sub> BN <sub>6</sub> O <sub>2</sub> S <sub>3</sub> Zn                            | C <sub>41</sub> H <sub>57</sub> BN <sub>6</sub> S <sub>3</sub> Zn     |
| formula weight                                      | 744.13                                                                                                      | 806.28                                                                |
| space group                                         | <i>P</i> 2/ <sub>1</sub>                                                                                    | <i>R</i> -3                                                           |
| <i>a</i> /Å                                         | 10.3568(8)                                                                                                  | 13.4730(14)                                                           |
| <i>b</i> /Å                                         | 19.5721(15)                                                                                                 | 13.4730(14)                                                           |
| <i>c</i> /Å                                         | 10.5278(11)                                                                                                 | 67.359(7)                                                             |
| α/°                                                 | 90                                                                                                          | 90                                                                    |
| β/°                                                 | 119.4240(1)                                                                                                 | 90                                                                    |
| γ/°                                                 | 90                                                                                                          | 120                                                                   |
| <i>V</i> /Å <sup>3</sup>                            | 1858.8(3)                                                                                                   | 10589(2)                                                              |
| <i>Z</i>                                            | 2                                                                                                           | 12                                                                    |
| temperature (K)                                     | 130(2)                                                                                                      | 130(2)                                                                |
| radiation (λ, Å)                                    | 0.71073                                                                                                     | 0.71073                                                               |
| ρ (calcd.), g cm <sup>-3</sup>                      | 1.330                                                                                                       | 1.517                                                                 |
| μ (Mo Kα), mm <sup>-1</sup>                         | 0.868                                                                                                       | 0.916                                                                 |
| θ max, deg.                                         | 30.974                                                                                                      | 28.276                                                                |
| no. of data collected                               | 30599                                                                                                       | 37365                                                                 |
| no. of data used                                    | 11621                                                                                                       | 2775                                                                  |
| no. of parameters                                   | 442                                                                                                         | 121                                                                   |
| <i>R</i> <sub>1</sub> [ <i>I</i> > 2σ( <i>I</i> )]  | 0.0467                                                                                                      | 0.0411                                                                |
| <i>wR</i> <sub>2</sub> [ <i>I</i> > 2σ( <i>I</i> )] | 0.0785                                                                                                      | 0.1274                                                                |
| <i>R</i> <sub>1</sub> [all data]                    | 0.0694                                                                                                      | 0.0496                                                                |
| <i>wR</i> <sub>2</sub> [all data]                   | 0.0858                                                                                                      | 0.1322                                                                |
| GOF                                                 | 1.007                                                                                                       | 1.037                                                                 |
| <i>R</i> <sub>int</sub>                             | 0.0576                                                                                                      | 0.0538                                                                |

**Table 1 (continued).** Crystal, intensity collection and refinement data.

| <b>[Tm<sup>Bu<sup>t</sup></sup>]ZnMoCp(CO)<sub>3</sub><br/>•2(C<sub>6</sub>H<sub>6</sub>)</b> |                                                                                    |
|-----------------------------------------------------------------------------------------------|------------------------------------------------------------------------------------|
| lattice                                                                                       | Triclinic                                                                          |
| formula                                                                                       | C <sub>41</sub> H <sub>51</sub> BMoN <sub>6</sub> O <sub>3</sub> S <sub>3</sub> Zn |
| formula weight                                                                                | 944.17                                                                             |
| space group                                                                                   | <i>P</i> -1                                                                        |
| <i>a</i> /Å                                                                                   | 10.2866(10)                                                                        |
| <i>b</i> /Å                                                                                   | 12.0489(12)                                                                        |
| <i>c</i> /Å                                                                                   | 19.2260(19)                                                                        |
| $\alpha$ /°                                                                                   | 92.6350(10)                                                                        |
| $\beta$ /°                                                                                    | 93.9040(10)                                                                        |
| $\gamma$ /°                                                                                   | 114.8880(10)                                                                       |
| <i>V</i> /Å <sup>3</sup>                                                                      | 2149.3(4)                                                                          |
| <i>Z</i>                                                                                      | 2                                                                                  |
| temperature (K)                                                                               | 296(2)                                                                             |
| radiation ( $\lambda$ , Å)                                                                    | 0.71073                                                                            |
| $\rho$ (calcd.), g cm <sup>-3</sup>                                                           | 1.459                                                                              |
| $\mu$ (Mo K $\alpha$ ), mm <sup>-1</sup>                                                      | 1.040                                                                              |
| $\theta$ max, deg.                                                                            | 30.722                                                                             |
| no. of data collected                                                                         | 35130                                                                              |
| no. of data used                                                                              | 13225                                                                              |
| no. of parameters                                                                             | 518                                                                                |
| $R_1$ [ $I > 2\sigma(I)$ ]                                                                    | 0.0398                                                                             |
| $wR_2$ [ $I > 2\sigma(I)$ ]                                                                   | 0.0871                                                                             |
| $R_1$ [all data]                                                                              | 0.0607                                                                             |
| $wR_2$ [all data]                                                                             | 0.0965                                                                             |
| GOF                                                                                           | 1.033                                                                              |
| $R_{\text{int}}$                                                                              | 0.0504                                                                             |



## REFERENCES

- (1) (a) McNally, J. P.; Leong, V. S.; Cooper, N. J. in *Experimental Organometallic Chemistry*, Wayda, A. L.; Darensbourg, M. Y., Eds.; American Chemical Society: Washington, DC, 1987; Chapter 2, pp 6-23. (b) Burger, B. J.; Bercaw, J. E. (b) Burger, B.J.; Bercaw, J. E. in *Experimental Organometallic Chemistry*; Wayda, A. L.; Darensbourg, M. Y., Eds.; American Chemical Society: Washington, DC, 1987; Chapter 4, pp 79-98. (c) Shriver, D. F.; Drezdson, M. A.; *The Manipulation of Air-Sensitive Compounds*, 2<sup>nd</sup> Edition; Wiley-Interscience: New York, 1986.
- (2) (a) Gottlieb, H. E.; Kotlyar, V.; Nudelman, A. J. *Org. Chem.* **1997**, *62*, 7512-7515. (b) Fulmer, G. R.; Miller, A. J. M.; Sherden, N. H.; Gottlieb, H. E.; Nudelman, A.; Stoltz, B. M.; Bercaw, J. E.; Goldberg, K. I. *Organometallics* **2010**, *29*, 2176-2179.
- (3) Dungan, C. H.; van Wazer, J. R. *Compilation of Reported <sup>19</sup>F NMR Chemical Shifts 1951 to mid 1967*, Wiley-Interscience: New York, 1970.
- (4) Melnick, J. G.; Docrat, A.; Parkin, G. *Chem. Commun.* **2004**, 2870-2871.
- (5) Fischer, E. O. *Inorg. Syn.* **1963**, *7*, 136-139.
- (6) Rauch, M.; Rong, Y.; Sattler, W.; Parkin, G. *Polyhedron* **2015**  
<http://dx.doi.org/10.1016/j.poly.2015.10.010>.
- (7) (a) Sheldrick, G. M. SHELXTL, An Integrated System for Solving, Refining and Displaying Crystal Structures from Diffraction Data; University of Göttingen, Göttingen, Federal Republic of Germany, 1981. (b) Sheldrick, G. M. *Acta Cryst.* **2008**, *A64*, 112-122.
- (8) (a) Melnick, J. G.; Parkin, G. *Dalton Trans.* **2006**, 4207-4210. (b) Kreider-Mueller, A.; Quinlivan, P. J.; Rong, Y.; Owen, J. S.; Parkin, G. J. *Organomet. Chem.* **2015**, *792*, 177-183.
